# Supplementary material for: Characteristics of the top 100 cited original studies on extracorporeal membrane oxygenation: a bibliometric analysis
Source: PubMed Central journal article supplement — J Thorac Dis. 2024 Aug 19;16(9):5507–17. doi: 10.21037/jtd-24-597 (PMC11494577; doi:10.21037/jtd-24-597), 2024-08-19
Supplement: jtd-16-09-5507-supplementary.pdf [file jtd-16-09-5507-supplementary.pdf]

**Table S1** Distribution of top-100 cited articles on extracorporeal membrane oxygenation by publication year

| Publication year | Number | Cited times | Usage count |
|------------------|--------|-------------|-------------|
| 1979             | 1      | 1,146       | 40          |
| 1982             | 1      | 263         | 4           |
| 1986             | 1      | 318         | 16          |
| 1989             | 1      | 398         | 9           |
| 1992             | 1      | 634         | 10          |
| 1993             | 1      | 261         | 9           |
| 1994             | 2      | 590         | 26          |
| 1996             | 3      | 1,024       | 27          |
| 1997             | 5      | 2,129       | 45          |
| 1998             | 3      | 721         | 22          |
| 2000             | 3      | 1,180       | 31          |
| 2001             | 1      | 252         | 4           |
| 2002             | 4      | 1,083       | 37          |
| 2003             | 1      | 287         | 13          |
| 2004             | 2      | 576         | 19          |
| 2005             | 1      | 222         | 7           |
| 2006             | 1      | 239         | 10          |
| 2007             | 3      | 716         | 36          |
| 2008             | 2      | 1,353       | 65          |
| 2009             | 5      | 5,392       | 429         |
| 2010             | 2      | 721         | 17          |
| 2011             | 9      | 3,367       | 279         |
| 2012             | 4      | 1,276       | 70          |
| 2013             | 10     | 3,365       | 604         |
| 2014             | 2      | 918         | 85          |
| 2015             | 4      | 1,762       | 126         |
| 2016             | 2      | 777         | 73          |
| 2017             | 3      | 804         | 45          |
| 2018             | 1      | 1,326       | 220         |
| 2020             | 19     | 16,956      | 1,110       |
| 2021             | 2      | 702         | 84          |

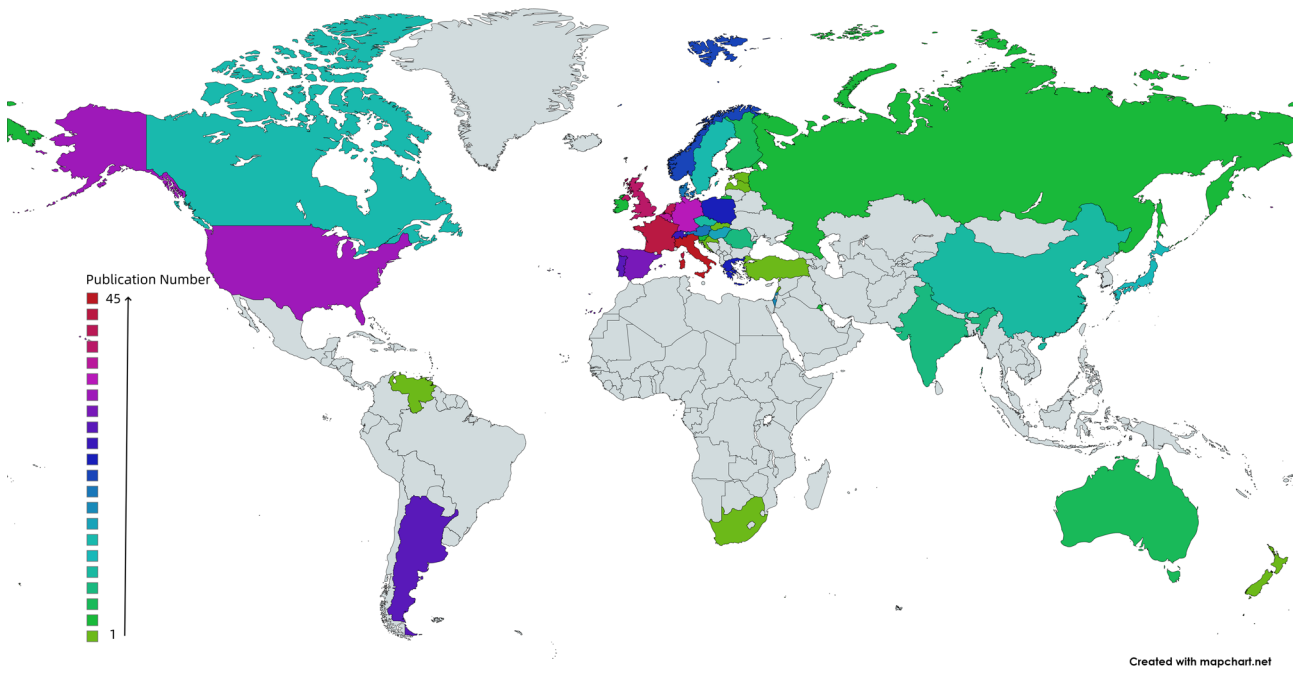

Figure S1 Global contribution.
